# Supplementary material
Source: PubMed Central journal article supplement (PMC7906744)
Supplement: mmc1.pdf [file mmc1.pdf]

# THE LANCET Psychiatry

## Supplementary appendix

This appendix formed part of the original submission. We post it as supplied by the authors.

Supplement to: Batty GD, Gale CR. Correspondence—Pre-pandemic mental illness and risk of death from COVID-19. *Lancet Psychiatry* 2021; **8**: 182–83.

*Appendix – Lancet Psychiatry letter ‘Pre-pandemic mental illness and risk of death from COVID-19’ (Batty, Gale)*

**Table. Indicators of pre-pandemic mental health and COVID-19 mortality in UK Biobank – analyses based on sub-sample with biological covariates**

|                                          | <b>Age-, sex-, ethnicity-, &amp; comorbidity-adjusted</b> | <b>Age-, sex-, ethnicity-, &amp; comorbidity-plus biomarker-adjusted</b> |
|------------------------------------------|-----------------------------------------------------------|--------------------------------------------------------------------------|
| Number of cases/number at risk           | 224/316,009                                               | 224/316,009                                                              |
| <b>Psychological distress</b>            |                                                           |                                                                          |
| Group 1                                  | 1.0 (ref)                                                 | 1.0                                                                      |
| Group 2                                  | 1.58 (1.17, 2.15)                                         | 1.54 (1.13, 2.09)                                                        |
| Group 3 (highest)                        | 1.89 (1.32, 2.66)                                         | 1.76 (1.24, 2.50)                                                        |
| P-value for trend                        | <0.0001                                                   | 0.001                                                                    |
| Per SD (2.11) increase in distress score | 1.30 (1.16, 1.46)                                         | 1.27 (1.13, 1.43)                                                        |
|                                          |                                                           |                                                                          |
| Number of cases/number at risk           | 253/349,078                                               | 253/349,078                                                              |
| <b>Psychiatric consultation</b>          |                                                           |                                                                          |
| No                                       | 1.0 (ref)                                                 | 1.0                                                                      |
| Yes                                      | 1.48 (1.04, 2.11)                                         | 1.44 (1.01, 2.06)                                                        |
| P-value for difference                   | 0.031                                                     | 0.042                                                                    |
|                                          |                                                           |                                                                          |
